# Supplementary material
Source: publisher figshare collection journal article supplement (https://acs.figshare.com/ndownloader/files/10295091)
Supplement: Supplementary file 1 [file 10295091]

## Supporting Information

### Spatial Isolation of Conformational Isomers of Hydroquinone and Its Water Cluster Using the Stark Deflector

Hyun Sik You, Junggil Kim, Songhee Han, Doo-Sik Ahn, Jean Sun Lim,  
and Sang Kyu Kim\*

*Department of Chemistry, KAIST, Daejeon 34141, Republic of Korea*

\*Corresponding Author; E-mail: [sangkyukim@kaist.ac.kr](mailto:sangkyukim@kaist.ac.kr)

#### Table of Contents

1. Dependence of deflection on voltages and carrier gas of 3-AP conformers
2. Deflection profiles of trans-3-AP seeded in Xenon
3. Stark-R2PI spectra and rotational state distributions at deflected regions of 3-AP
4. Stark energy curves for (*trans*, *cis*)-3-AP, HyQ, and HyQ-H<sub>2</sub>O conformers
5. Molecular parameters for simulation of deflection profile

1. Dependence of deflection on voltages and carrier gas of 3-AP conformers.

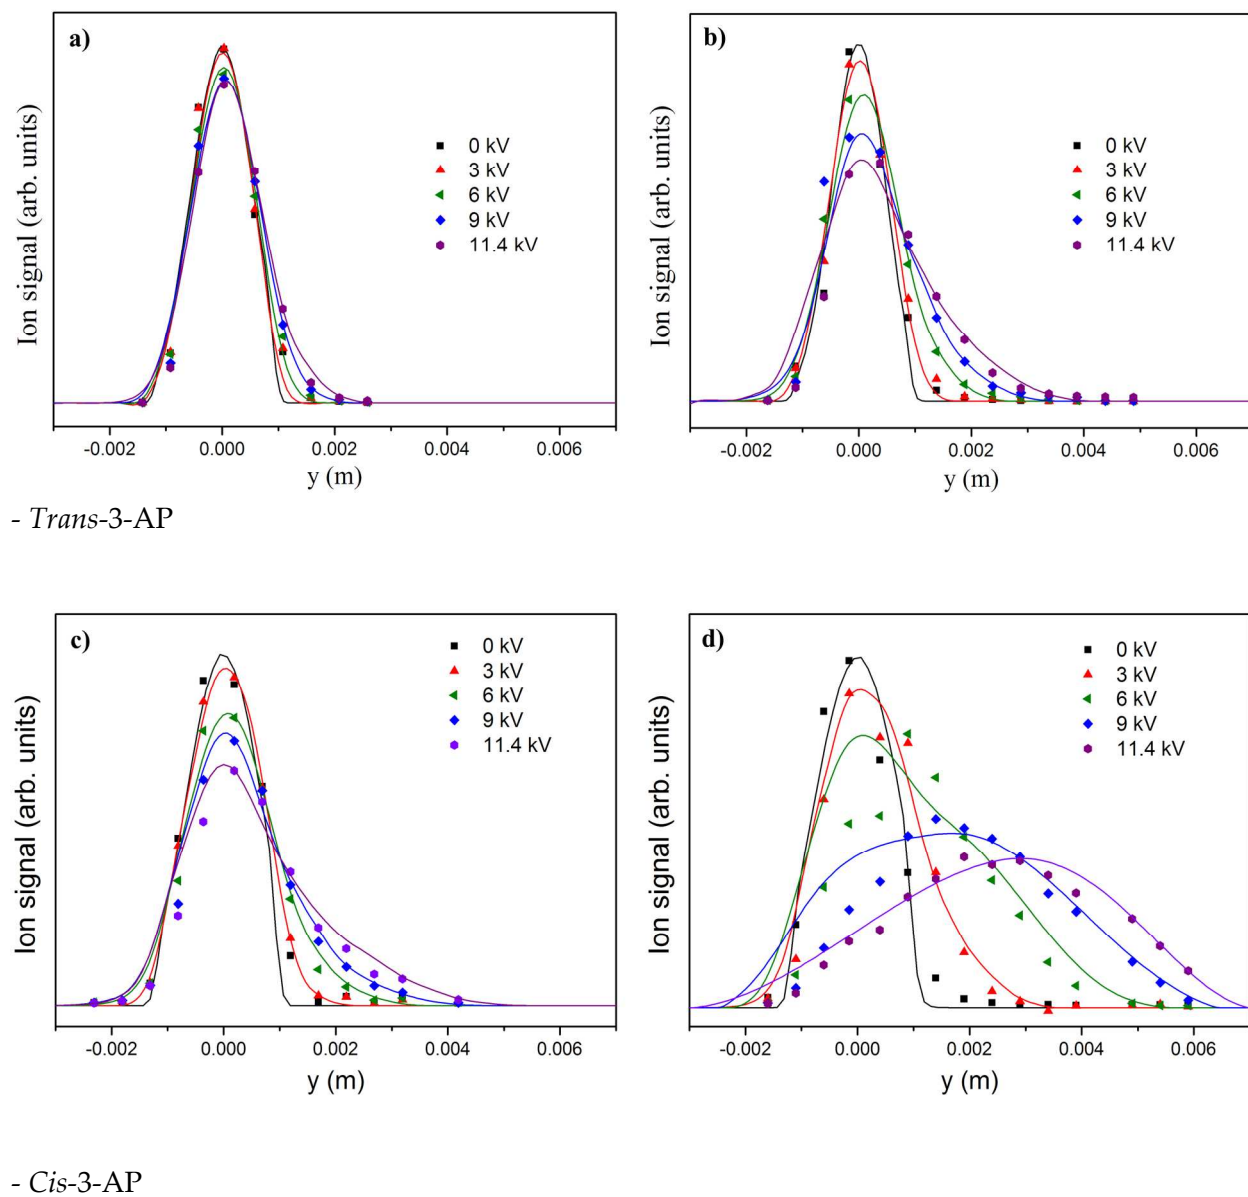

**Figure S1.** Deflection profiles of *trans*, *cis*-3-AP seeded in (a, c) Ne and (b, d) Ar at the voltages from 0 kV to 11.4 kV. Symbols represent experiment and lines are simulations.

2. Deflection  
trans-3-AP  
on.

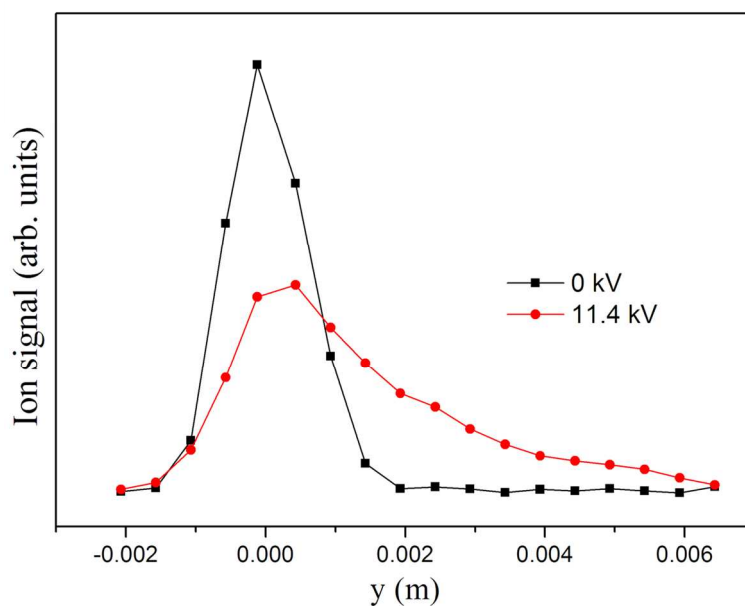

profiles of  
seeded in Xen-

**Figure S2.** Experimental deflection profiles of *trans*-3-AP seeded in Xe at the deflector voltage of 11.4 kV taken by monitoring the  $S_1$ - $S_0$  origin signal intensity. The average deflection position is estimated to be  $\sim 1$  mm.

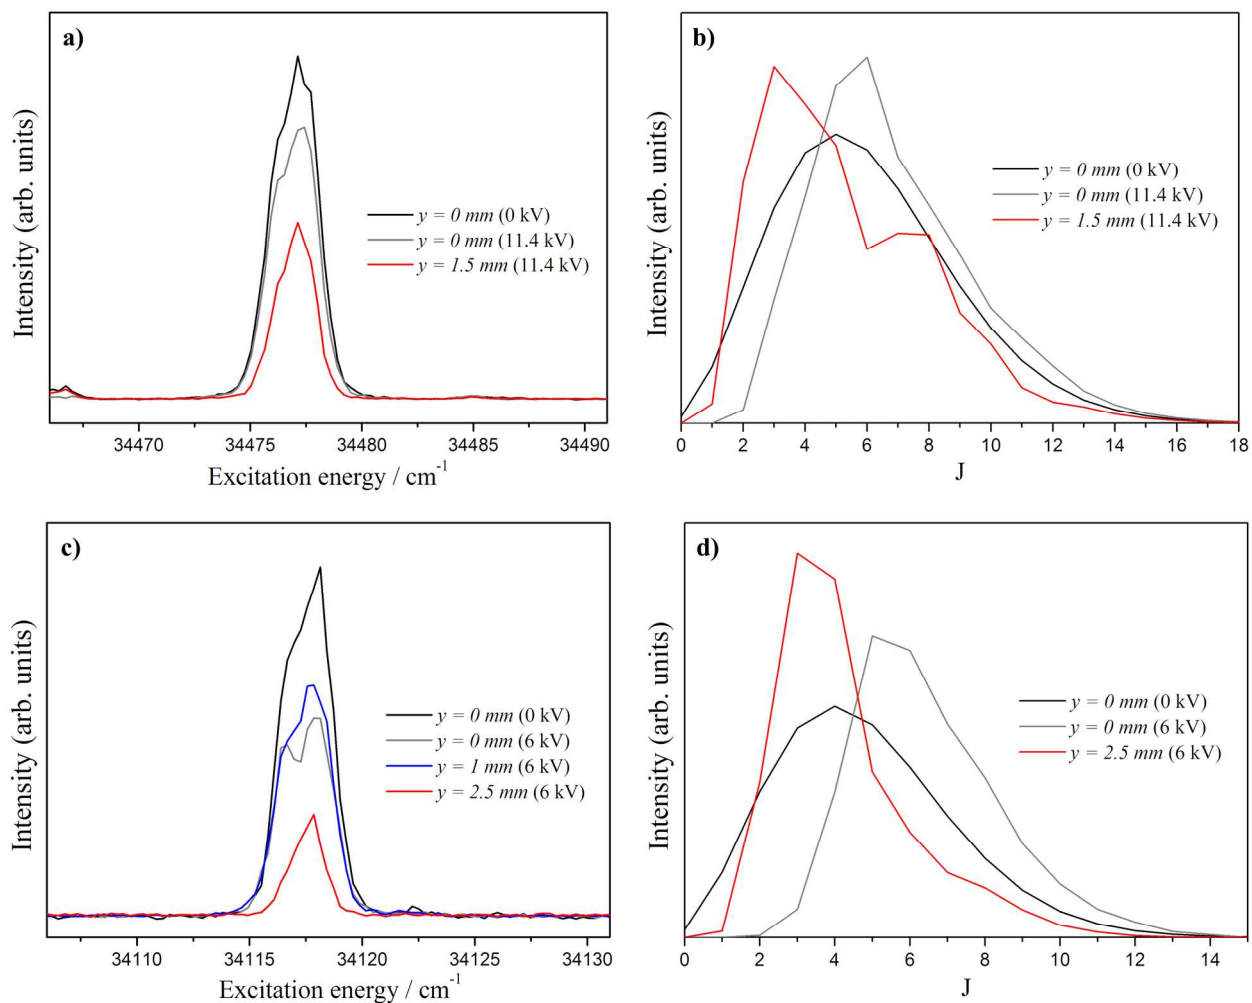

### 3. Stark-R2PI spectra and rotational state distributions at deflected regions of 3-AP.

**Figure S3.** Stark-R2PI spectra of (a) *trans*-3-AP and (c) *cis*-3-AP seeded in Ar at the origin band and corresponding normalized rotational state distributions (b, d) populated at specific deflected regions in the deflection profiles at simulated  $T_{\text{rot}}$  (Table 1). Since rotational states with lowest  $J$ 's deflect most, relative population of low  $J$ 's stands out in the deflected region. Accordingly,

full width at half maximum (FWHM) of the origin peak of *cis(trans)*-3-AP becomes shortened from 2.5 (2.4)  $\text{cm}^{-1}$  to 1.7 (2.0)  $\text{cm}^{-1}$ , respectively.

4. Stark energy  
3-AP, HyQ, and  
ers.

curves for (*trans*, *cis*)-  
HyQ-H<sub>2</sub>O conform-

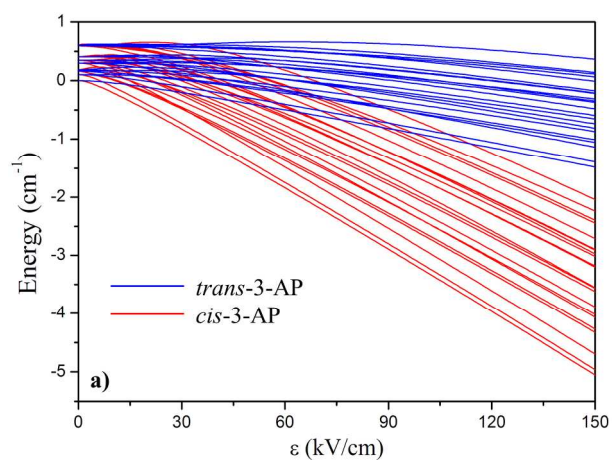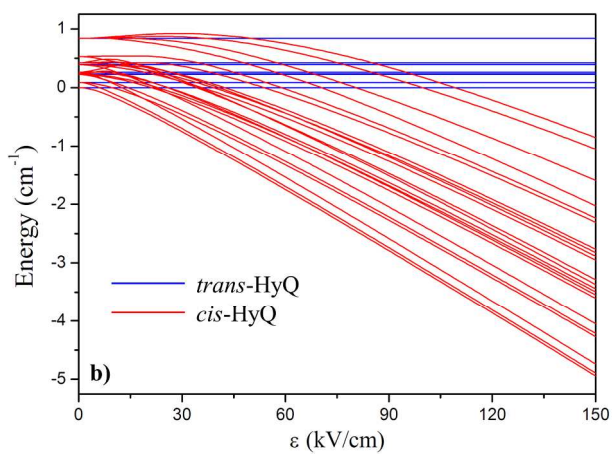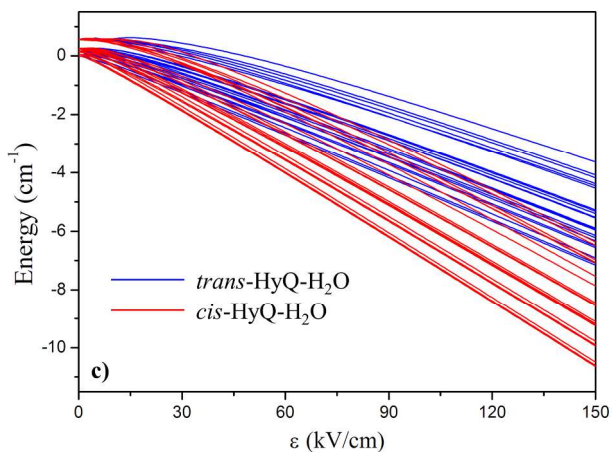

**Figure S4.** Stark energy shifts of 3-AP, HyQ and HyQ-H<sub>2</sub>O conformational isomers for the lowest rotational quantum states ( $J \leq 2$ ) as a function of applied electric field strengths.<sup>1,2</sup>

## 5. Molecular parameters for simulation of deflection profile

**Table S1.** Molecular mass, rotational constants, and electric dipole moments along the principal axis.

|                          | <i>cis(trans)</i> -3-AP <sup>a</sup> | <i>cis</i> <sup>b</sup> ( <i>trans</i> <sup>c</sup> )-HyQ | <i>cis(trans)</i> -HyQ-H <sub>2</sub> O <sup>d</sup> |
|--------------------------|--------------------------------------|-----------------------------------------------------------|------------------------------------------------------|
| Molecular mass           |                                      |                                                           |                                                      |
| Mass (g/mol)             | 109.13                               | 110.11                                                    | 128.13                                               |
| Rotational Constants     |                                      |                                                           |                                                      |
| A (MHz)                  | 3734.93 (3730.17)                    | 5614.14 (5615.1)                                          | 3844.31 (3820.5)                                     |
| B (MHz)                  | 1823.21 (1828.26)                    | 1481.59 (1481.7)                                          | 757.35 (760.58)                                      |
| C (MHz)                  | 1226.49 (1228.19)                    | 1172.67 (1172.8)                                          | 634.59 (636.20)                                      |
| Electric dipole moments  |                                      |                                                           |                                                      |
| $\mu_A$ (D)              | 1.772 (0.5563)                       | 0 (0)                                                     | -2.8280 (-2.6244)                                    |
| $\mu_B$ (D)              | 1.517 (0.5375)                       | 2.38 (0)                                                  | 3.6821 (1.7094)                                      |
| $\mu_C$ (D)              | 0 (0)                                | 0 (0)                                                     | 0 (0)                                                |
| $\mu_{\text{Total}}$ (D) | 2.33 (0.77)                          | 2.38 (0)                                                  | 4.64 (3.13)                                          |

<sup>a</sup> The values from ref. *Phys. Chem. Chem. Phys.*, 10, 666-673 (2008).<sup>3</sup>

<sup>b</sup> The values from ref. *J. Chem. Phys.*, 100, 8569 (1994).<sup>4</sup>

<sup>c</sup> The values from ref. *J. Chem. Phys.*, 99, 5078 (1993).<sup>5</sup>

<sup>d</sup> Calculated values from B3LYP/6-311++G(3df,3pd).

## Supporting References

- (1) Chang, Y. -P.; Filsinger, F.; Sartakov, B. G.; Küpper, J. CMI<sub>STARK</sub>: Python Package for the Stark-Effect Calculation and Symmetry Classification of Linear, Symmetric and Asymmetric Top Wavefunctions in DC Electric fields. *Comput. Phys. Commun.* **2014**, *185*, 339-349.
- (2) Chang, Y. -P.; Horke, D. A.; Trippel, S.; Küpper, J. Spatially-Controlled Complex Molecules and Their Applications. *Int. Rev. Phys. Chem.* **2015**, *34*, 557-590.
- (3) Filsinger, F.; Wohlfart, K.; Schnell, M.; Grabow, J.-U.; Küpper, J. Precise Dipole Moments and Quadrupole Coupling Constants of the Cis and Trans Conformers of 3-Aminophenol: Determination of the Absolute Conformation. *Phys. Chem. Chem. Phys.* **2008**, *10*, 666-673.
- (4) Caminati, W.; Melandri, S.; Favero, L. B. Microwave Spectroscopy of Hydroquinone: the Rotational Spectrum of the Cis conformer. *J. Chem. Phys.* **1994**, *100*, 8569.
- (5) Humphrey, S. J.; Pratt, D. W. High Resolution  $S_1 \leftarrow S_0$  Fluorescence Excitation Spectra of Hydroquinone. Distinguishing the Cis and Trans Rotamers by Their Nuclear Spin Statistical Weights, *J. Chem. Phys.* **1993**, *99*, 5078.
